# Supplementary material
Source: PubMed Central journal article supplement (PMC3807457)
Supplement: JB.00630-13_zjb999092816so1.pdf [file JB.00630-13_zjb999092816so1.pdf]

**Table S1.** Primers used in this study.

| Primer        | Sequence and Description                                                                                                                                                                |
|---------------|-----------------------------------------------------------------------------------------------------------------------------------------------------------------------------------------|
| 1483promF     | 5'-GAGAATTCGTCACGTCGTTCT-3'<br>binds 379 bp upstream of <i>secY</i> ( <i>msmeg_1483</i> ), contains engineered EcoRI site, used to amplify <i>secY</i> promoter region                  |
| 1483promR     | 5'-GAGAATTCGTCAGCGACGAGATG-3'<br>binds at bp 34 of <i>secY</i> ( <i>msmeg_1483</i> ) coding sequence, contains engineered EcoRI site, used to amplify <i>secY</i> promoter              |
| secYNotI      | 5'-GAGCGCCGTCACGTCGTTCTC-3'<br>binds 379 bp upstream of <i>secY</i> ( <i>msmeg_1483</i> ), contains an engineered NotI site, used to amplify <i>secY</i> with its native promoter       |
| secYEcoRV     | 5'-GAGATATCAGGCGTCCGAGCAGAAC-3'<br>binds 23 bp downstream of <i>secY</i> ( <i>msmeg_1483</i> ), contains an engineered EcoRV site, used to amplify <i>secY</i> with its native promoter |
| secY5'RACE-R1 | 5'-GACCTGCGGATGCTGTAAC-3'<br>binds at bp 153 of <i>secY</i> ( <i>msmeg_1483</i> ) coding sequence, used to reverse transcribe <i>secY</i> transcript 5' ends to cDNA for 5' RLM-RACE    |
| secY5'RACE-R2 | 5'-GGATTACAGCCCAAGTGAACAG-3'<br>binds at bp 79 of <i>secY</i> ( <i>msmeg_1483</i> ) coding sequence, used to amplify <i>secY</i> transcript 5' ends for 5' RLM-RACE                     |
| secY5'RACE-R3 | 5'-GTGGTCCAGGTCATGGTCAAG-3'<br>binds 51 bp upstream of <i>secY</i> ( <i>msmeg_1483</i> ), used to amplify <i>secY</i> transcript 5' ends for 5' RLM-RACE                                |
| secYF1        | 5'-GTGCTTCGGCTTTCATCTC-3'<br>binds at bp 1 of <i>secY</i> ( <i>msmeg_1483</i> ) coding sequence, used for quantitative RT-PCR                                                           |
| secYR1        | 5'-CGGATGCTGTAAC-3'<br>binds at bp 147 of <i>secY</i> ( <i>msmeg_1483</i> ) coding sequence, used for quantitative RT-PCR                                                               |
| rpoBF         | 5'-GTCTTAGCCAGCAAGTC-3'<br>binds at bp 25 of <i>rpoB</i> ( <i>msmeg1367</i> ) coding sequence, used for quantitative RT-PCR                                                             |
| rpoBR         | 5'-TCGAAGGAATCCGTCTGAAC-3'<br>binds at bp 158 of <i>rpoB</i> ( <i>msmeg1367</i> ) coding sequence, used for quantitative RT-PCR                                                         |
